# Supplementary material
Source: PubMed Central journal article supplement (PMC4845797)

## SUPPLEMENTARY DATA

**Fig. S1. Genome-wide multi-trait QTL mapping scan for mean average petal number and Levene's statistic on flowers 1–24.** The upper panel shows the log transformed test statistic [ $-\log_{10}(P)$ ] plotted against genetic position. Chromosomes 1–8 are labelled on the  $x$ -axis and the significance threshold ( $\alpha=0.05$ ) is indicated by the horizontal red line. The lower panel represents significant allelic effects of the QTL, as a heat-map scale, on multiple traits indicated on the  $y$ -axis: muPN - mean average petal number, LS - Levene's statistic. QTL effects where the Wa allele reduces the trait are shown in blue and those where the Wa allele increases the trait in yellow-red. Darker shades represent stronger effects.

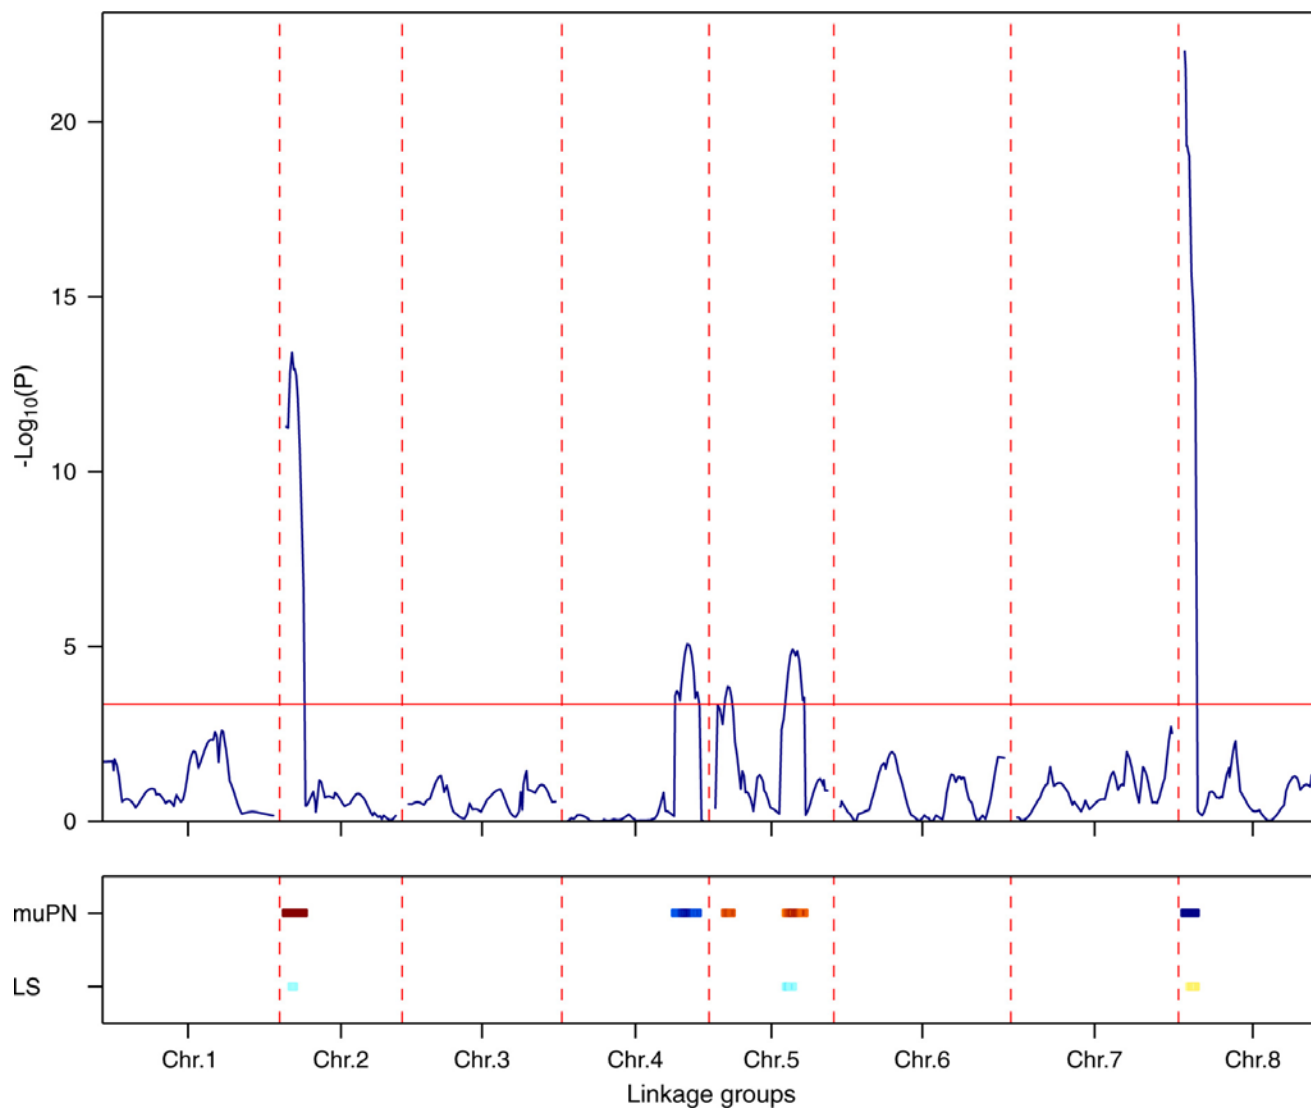

Supplement: supp_mcv131_aob-15218-s01.pdf [file supp_mcv131_aob-15218-s01.pdf]
